# Supplementary material for: Caulerpa lentilliferapolysaccharides enhance the immunostimulatory activity in immunosuppressed mice in correlation with modulating gut microbiota
Source: Royal Society of Chemistry journal article supplement (doi:10.1039/c9fo00713j), 2019-01-01
Supplement: c9fo00713j1.pdf [file c9fo00713j1.pdf]

**Figure S1** Effect of *Caulerpa lentillifera* polysaccharides on daily food intake in immunosuppressed mice. NC, normal control; MC, model control; PC, positive control; HCLP, 100 mg/kg·bw CLP; MCLP, 50 mg/kg·bw CLP; LCLP, 25 mg/kg·bw CLP.

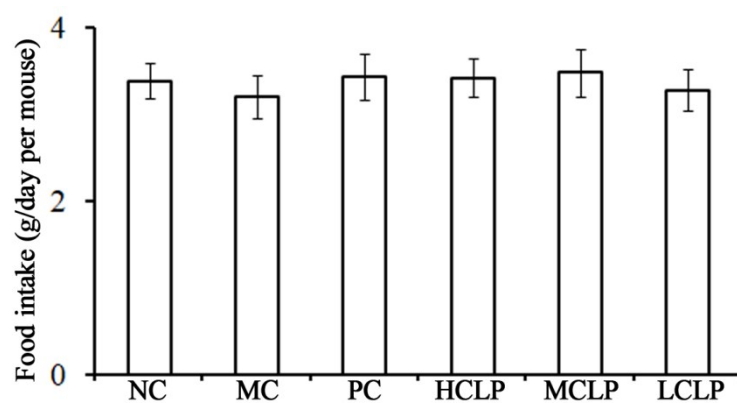

**Figure S2** The *in vitro* fermentation of *Caulerpa lentillifera* polysaccharides with the feces from normal BALB/c mice at 0, 6, 12, 24, 48 and 72 h. (a) OD600 nm of gut microbiota compared between blank and CLP groups; (b) Total sugar content and reducing sugar content of CLP detected at 490 nm and 525 nm, respectively; (c) Production of SCFAs including acetate, propionate and butyrate during *in vitro* fermentation between blank and CLP groups.

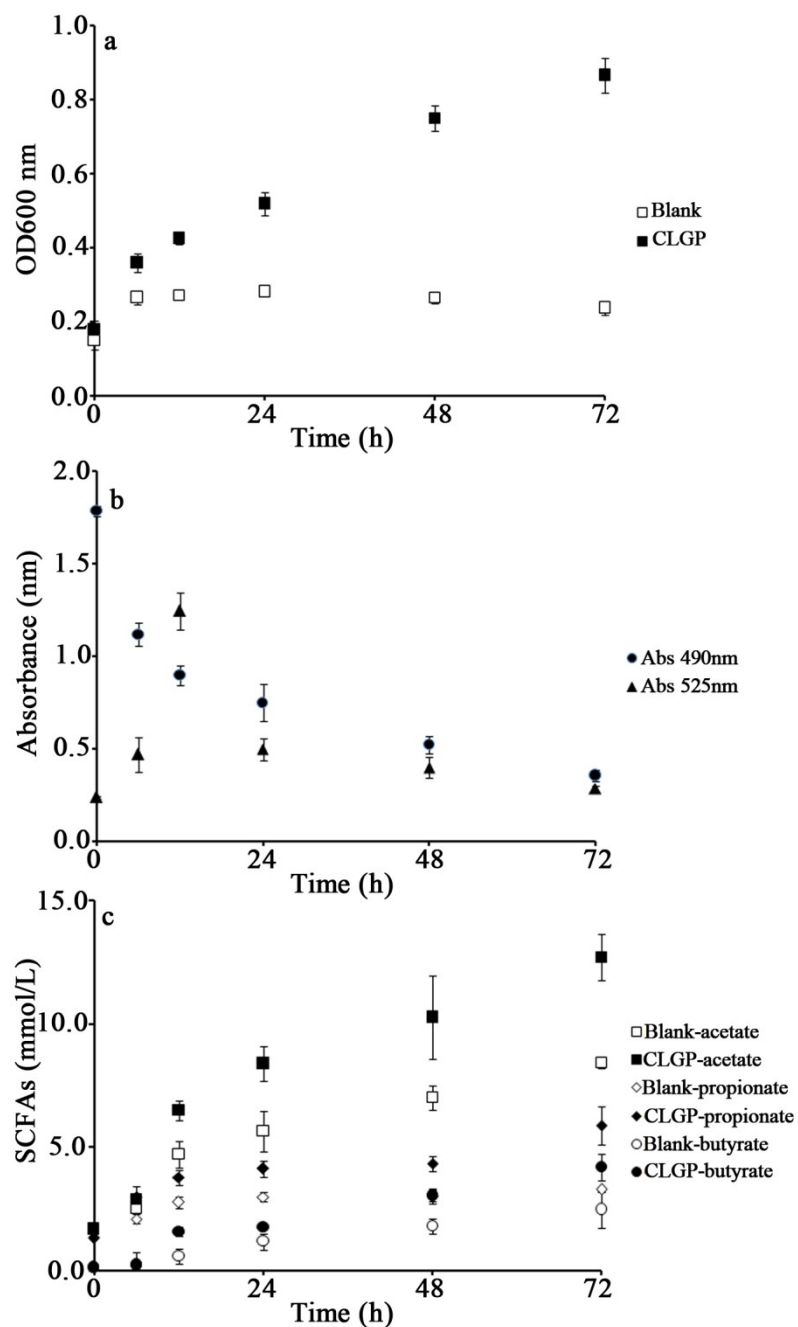

**Figure S3** HPGPC chromatogram of *Caulerpa lentillifera* polysaccharides during the *in vitro* fermentation with the feces from normal BALB/c mice. (a) The calibration curve; (b) The blank spectrum was injected with 20  $\mu$ L mobile phase, showing a peak at time of 27.172 min regarded as an impurity (\*); (c) *in vitro* fermentation of CLP at 0 h; (d) *in vitro* fermentation of CLP at 6 h; (e) *in vitro* fermentation of CLP at 12 h; (f) *in vitro* fermentation of CLP at 24 h; (g) *in vitro* fermentation of CLP at 48 h; (h) and *in vitro* fermentation of CLP at 72 h.

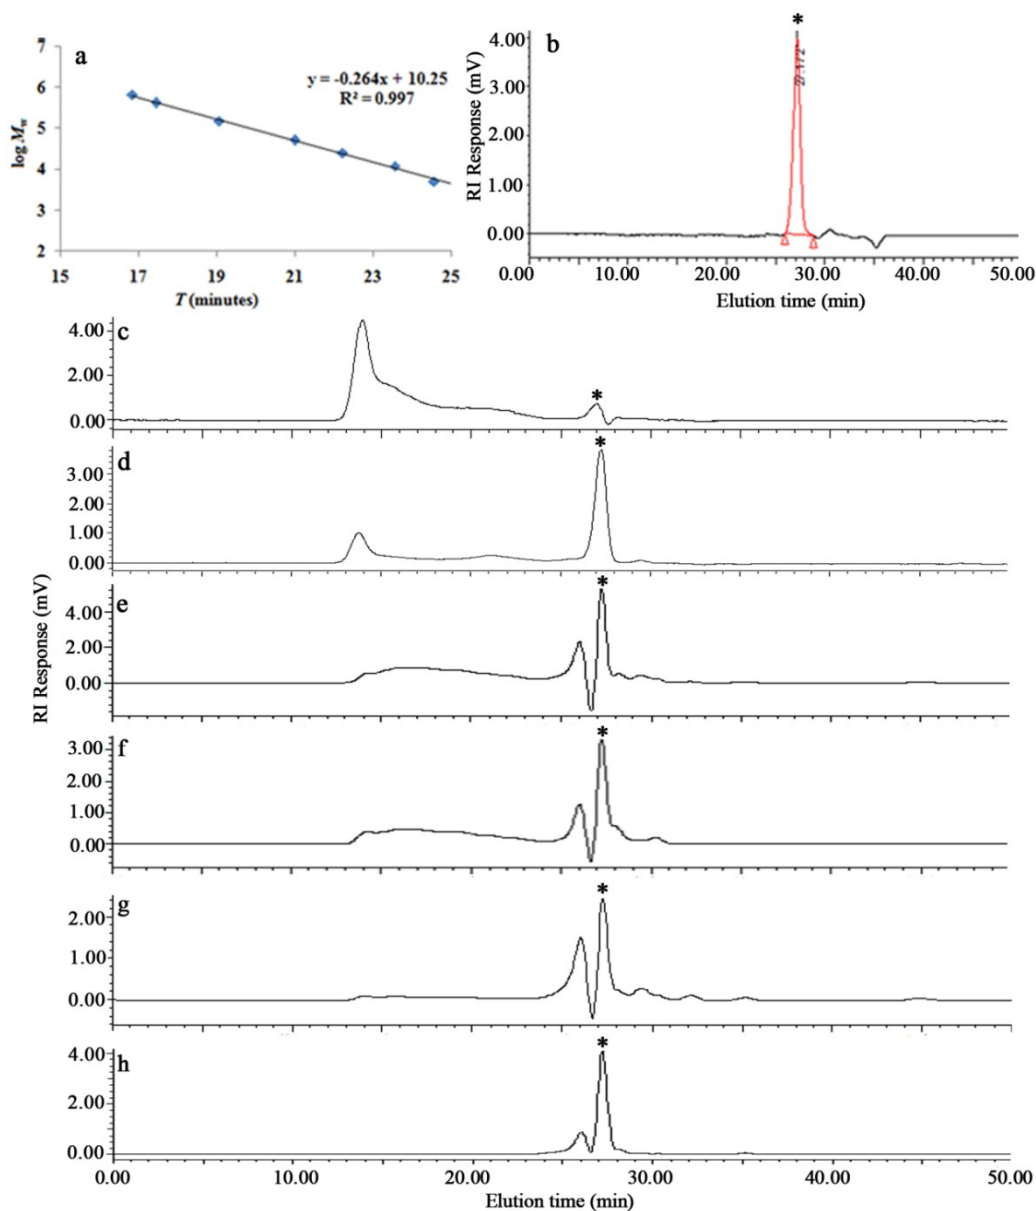

**Figure S4** Effect of *Caulerpa lentillifera* polysaccharides on TNF- $\alpha$  mRNA expression of immunosuppressed mice in thymic tissue (a), splenic tissue (b) and colonic tissue (c); and IL-1 $\beta$  mRNA expression of immunosuppressed mice in thymic tissue (a'), splenic tissue (b') and colonic tissue (c') by qRT PCR analysis. NC, normal control; MC, model control; PC, positive control; HCLP, 100 mg/kg·bw CLP; MCLP, 50 mg/kg·bw CLP; LCLP, 25 mg/kg·bw CLP. Data are expressed as the mean  $\pm$  SD (n=10). \*\*\* $p$  < 0.001, \*\* $p$  < 0.01 and \* $p$  < 0.05 are compared with NC group; ### $p$  < 0.001, ## $p$  < 0.01 and # $p$  < 0.05 are compared with MC group;  $\Delta\Delta\Delta p$  < 0.001,  $\Delta\Delta p$  < 0.01 and  $\Delta p$  < 0.05 are compared with PC group.

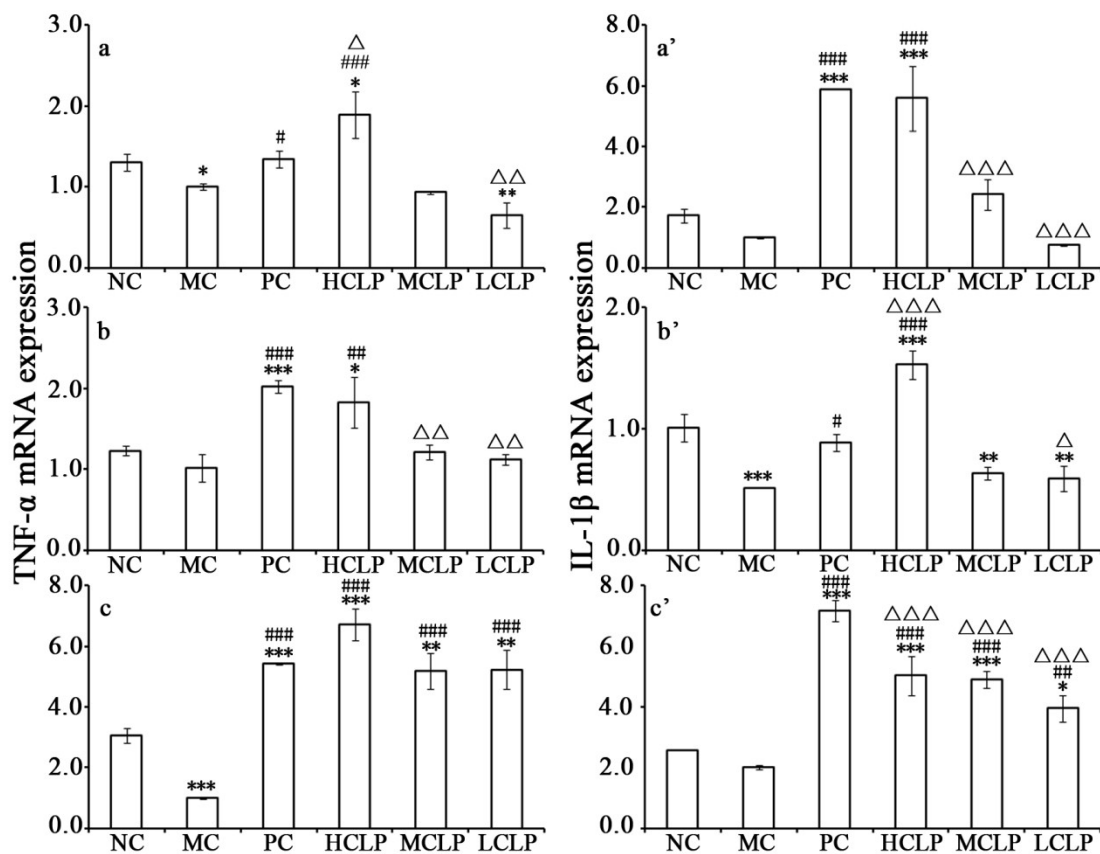

**Figure S5** Rarefaction analysis of cecal content from randomly five mice in NC, MC, HCLP and MCLP groups. NC, normal control; MC, model control; HCLP, 100 mg/kg·bw CLP; MCLP, 50 mg/kg·bw CLP.

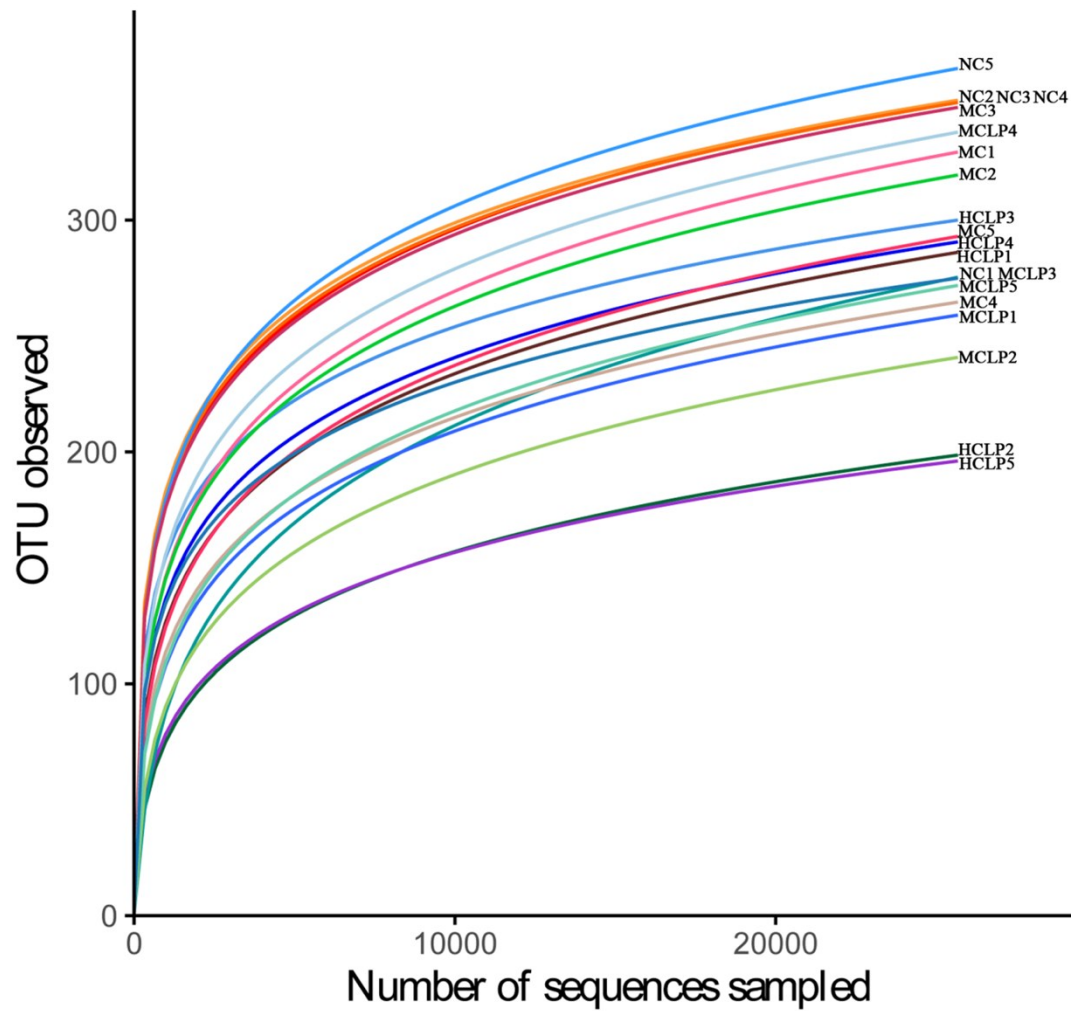

**Figure S6** Shannon analysis of cecal content from randomly five mice in NC, MC, HCLP and MCLP groups. NC, normal control; MC, model control; HCLP, 100 mg/kg·bw CLP; MCLP, 50 mg/kg·bw CLP.

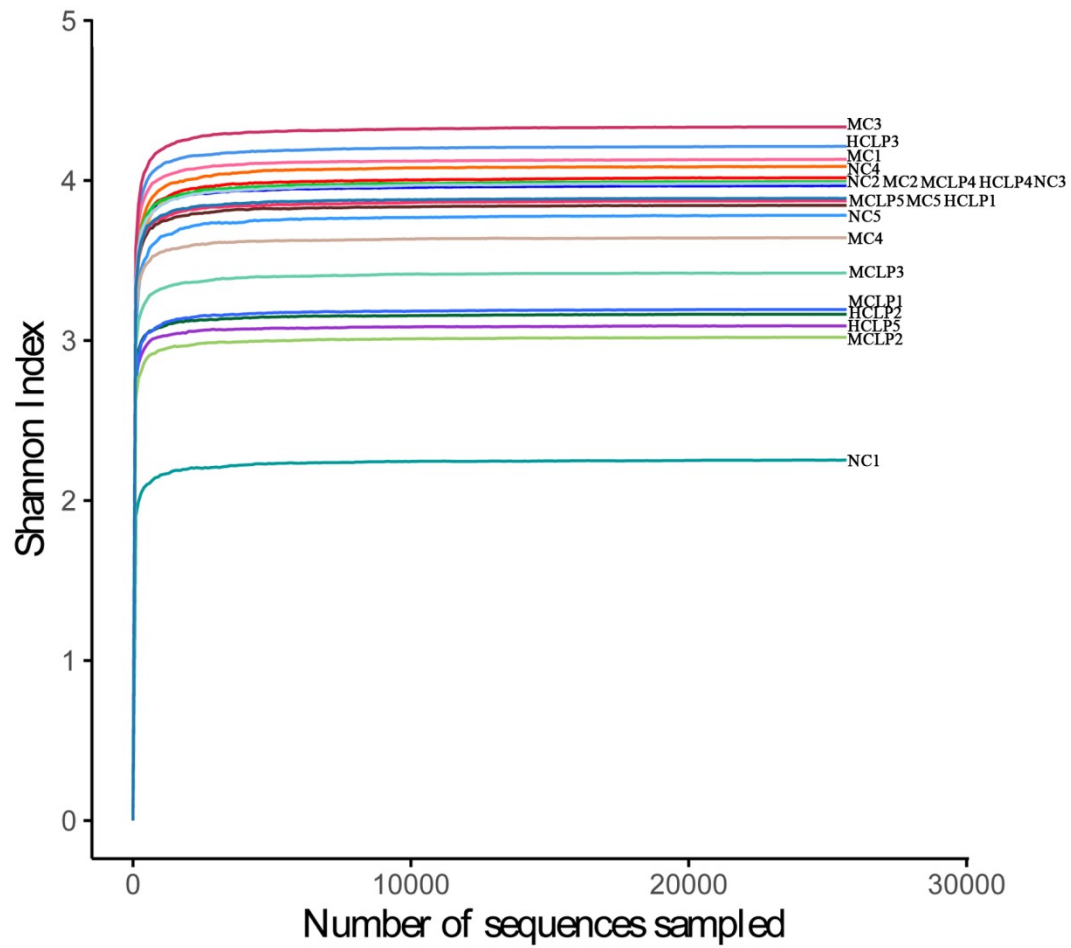

**Table S1** Primers used in this study.

| Name                   | Sequence                |
|------------------------|-------------------------|
| IL-1 $\beta$ Forward   | CCTGTGTCTTTCCCGTGGAC    |
| IL-1 $\beta$ Reverse   | CATCTCGGAGCCTGTAGTGC    |
| TNF- $\alpha$ Forward  | CCAGACCCTCACACTCACAAAC  |
| TNF- $\alpha$ Reverse  | GTAGACAAGGTACAACCCATCG  |
| $\beta$ -actin Forward | CGGTGAAGGCGACAGCAGTTGGT |
| $\beta$ -actin Reverse | AGGAGTGGGGGTGGCTTTTGGGA |

**Table S2** Diversity analysis of cecal content from randomly five mice in NC, MC, HCLP and MCLP groups. NC, normal control; MC, model control; HCLP, 100 mg/kg·bw CLP; MCLP, 50 mg/kg·bw CLP.

| Group | OUTs | Good's<br>Coverage | Chao1 | Ace | Shannon<br>index | Simpson<br>index |
|-------|------|--------------------|-------|-----|------------------|------------------|
| NC    | 331  | 0.998388           | 363   | 358 | 3.62             | 0.8794           |
| MC    | 305  | 0.998239           | 344   | 336 | 3.99             | 0.9592           |
| HCLP  | 251  | 0.998333           | 292   | 287 | 3.66             | 0.9420           |
| MCLP  | 272  | 0.998333           | 317   | 301 | 3.50             | 0.9223           |
